# Supplementary material for: Experiment and correlations for CO2–oil minimum miscibility pressure in pure and impure CO2streams
Source: Royal Society of Chemistry journal article supplement (doi:10.1039/c4ra11471j), 2014-11-19
Supplement: c4ra11471j2.pdf [file c4ra11471j2.pdf]

## Supporting information

### Figure content

Figure S1 Comparison of the predicted CO<sub>2</sub>-oil MMP under pure CO<sub>2</sub> between this work and references.

Figure S2 Comparison of the predicted CO<sub>2</sub>-oil MMP under  $x_{CO_2} < 0.5$  between this work and references.

Figure S3 Comparison of the predicted CO<sub>2</sub>-oil MMP under  $x_{CO_2} > 0.5$  between this work and references.

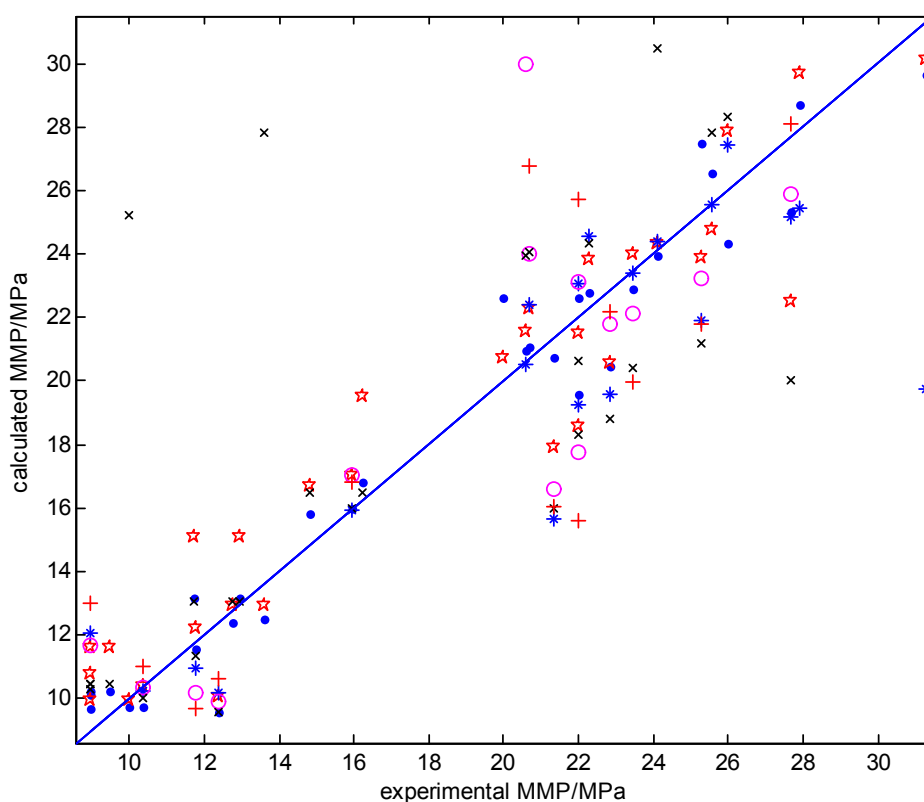

Figure S1 Comparison of the predicted CO<sub>2</sub>-oil MMP under pure CO<sub>2</sub> between this work and references (■, this work; ☆, Li et al.; \*, Shokir; ○, Emera and Sarma; ×, GlasØ; +, Alston et al.)

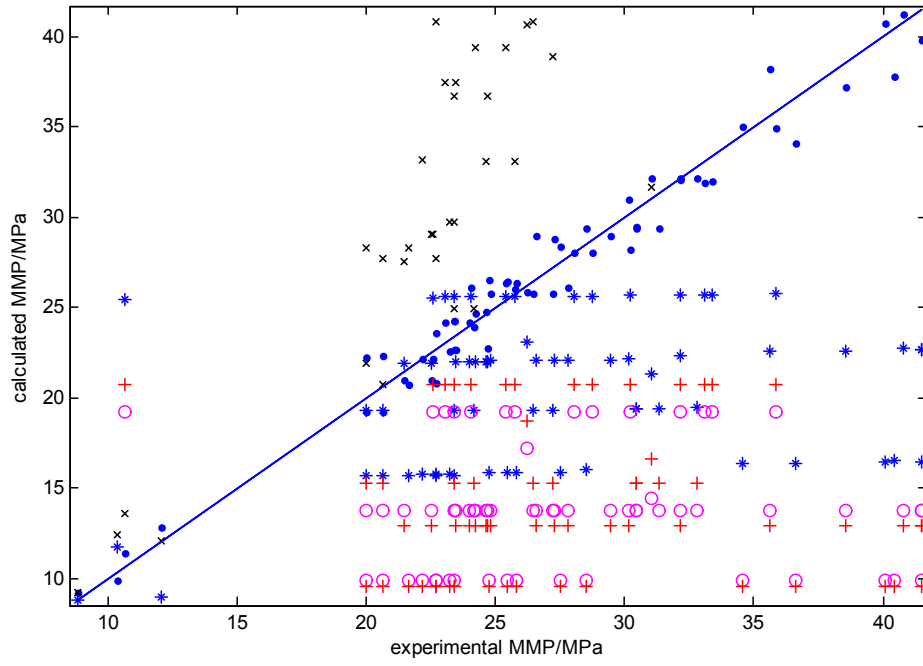

Figure S2 Comparison of the predicted CO<sub>2</sub>-oil MMP under  $x_{CO_2} < 0.5$  between this work and references (■, this work; \*, Shokir; ○, Emera and Sarma; ×, Sebastian et al.; +, Alston et al.)

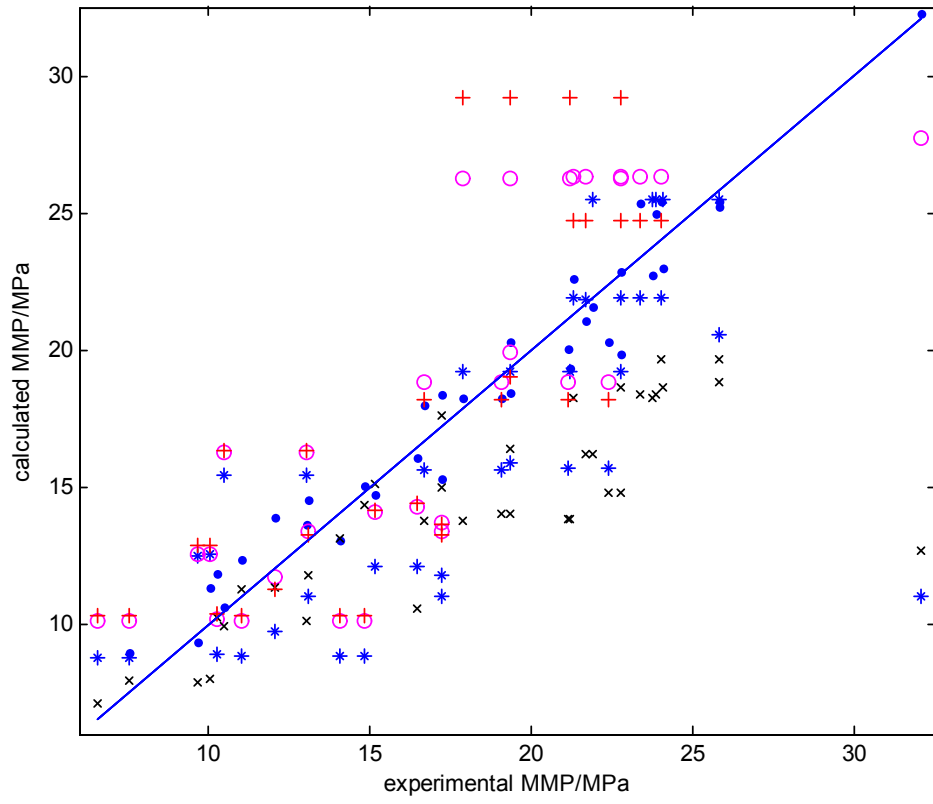

Figure S3 Comparison of the predicted CO<sub>2</sub>-oil MMP under  $x_{CO_2} > 0.5$  between this work and references (■, this work; \*, Shokir; ○, Emera and Sarma; ×, Sebastian et al.; +, Alston et al.)
